# Supplementary material for: Effects of Impregnated Amidophosphonate Ligand Concentration on the Uranium Extraction Behavior of Mesoporous Silica
Source: MDPI journal article supplement (doi:10.3390/molecules27144342), 2022-07-06
Supplement: s1 [file s1]

# Effects of Impregnated Amidophosphonate Ligand Concentration on the Uranium Extraction Behavior of Mesoporous Silica

Aline Dressler, Antoine Leydier \* and Agnès Grandjean

CEA, DES, ISEC, DMRC, Univ Montpellier, 34000 Marcoule, France; aline.dressler@cea.fr (A.D.); agnes.grandjean@cea.fr (A.G.)

\* Correspondence: antoine.leydier@cea.fr; Tel.: +33-46-633-9474

## I Materials

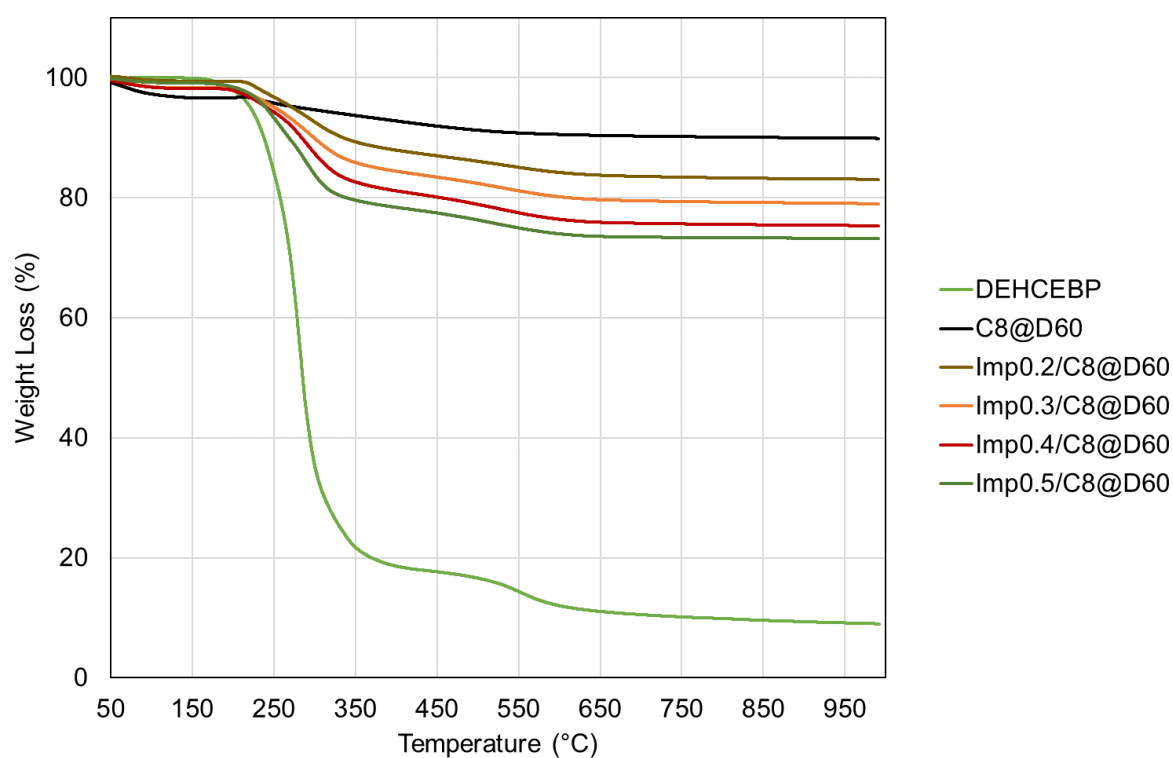

**Figure S1.** Thermal stability of the amidophosphonate ligand (DEHCEBP), the prefunctionalized support (C<sub>8</sub>@D60) and the impregnated materials with different DEHCEBP loadings (0.2–0.5 mmol·g<sup>-1</sup>) between 50 and 1000 °C.
